# Supplementary material for: The NCOR-HDAC3 co-repressive complex modulates the leukemogenic potential of the transcription factor ERG
Source: PubMed Central journal article supplement (PMC10514085; doi:10.1038/s41467-023-41067-2), 2023-09-21
Supplement: 41467_2023_41067_MOESM1_ESM.pdf [file 41467_2023_41067_MOESM1_ESM.pdf]

Figure S1

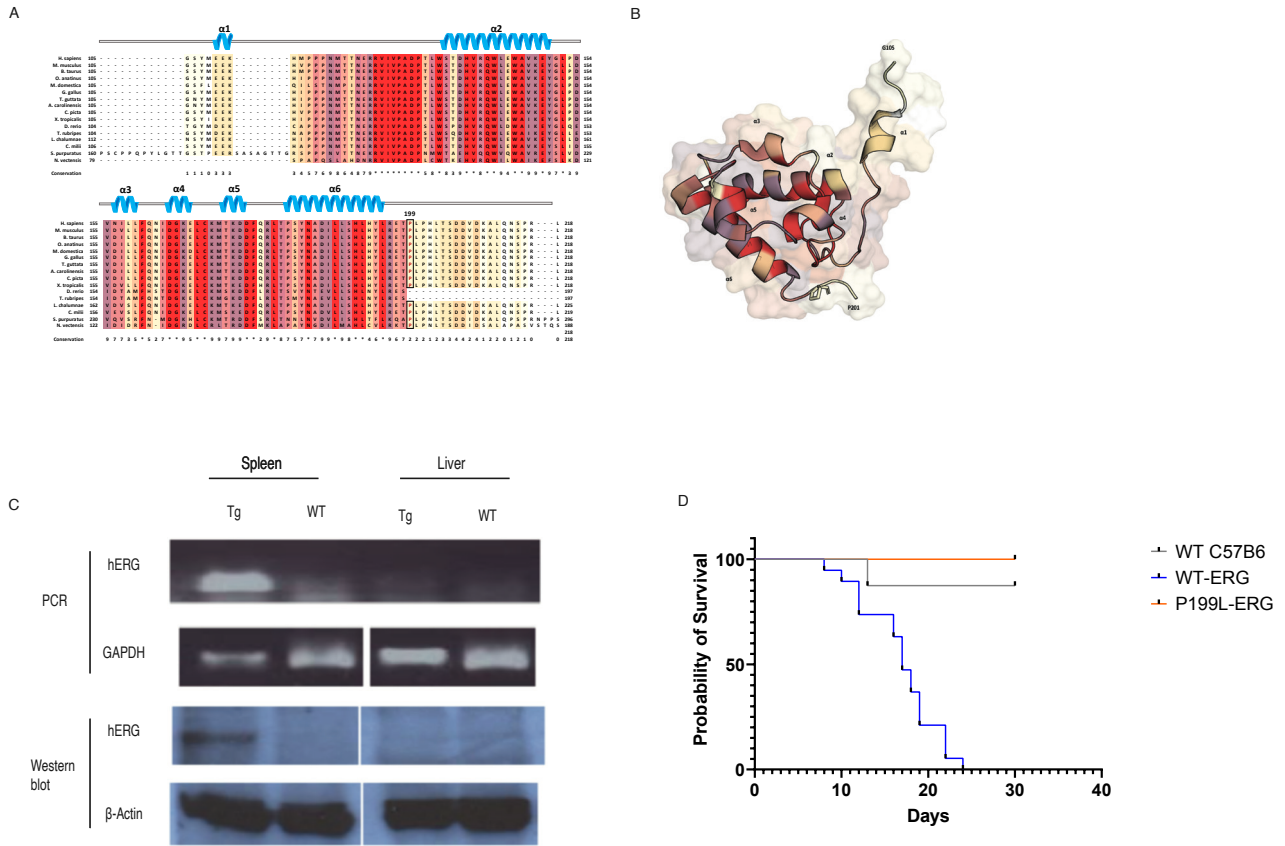

**Figure S1. P199 is evolutionarily conserved in the vertebrates and invertebrates, and its P199L mutant form is not leukemogenic in transgenic mice**

- Sequence alignment of ERG from different species. Conservation scores represent the physico-chemical properties that are conserved in the alignment. Dark shades of color and number indicate high conservation. Asterisks are colored red and indicate complete conservation. P199 is highlighted with the black box and red text.
- NMR Structure (PDB: 1SX6) colored according to the degree of conservation in the alignment. Structural elements are indicated.
- Expression of the cDNA of P199L-ERG from the spleen of the TgERG-P199L mice (upper panels) and protein (lower panels). Liver was used as a negative control.
- Survival curve of TgERG-P199L versus TgERG-WT. Log rank test,  $p < 0.0001$ . TgERG- Transgenic ERG mouse.

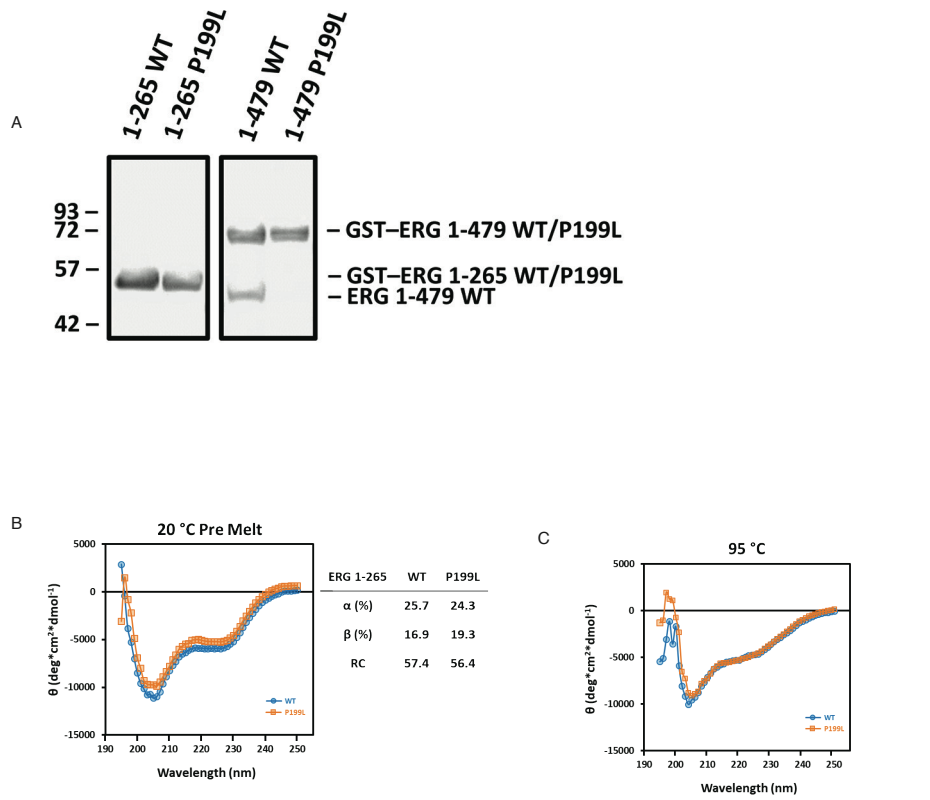

**Figure S2. P199L does not significantly affect the secondary structure or thermal stability of ERG.**

- A. Purification of recombinant ERG proteins expressed in E.Coli BL21. Coomassie-stained SDS-PAGE of purified proteins containing N-terminal GST purification tags.  
 B. Circular dichroism spectrum scan at 20°C pre-melt  
 C. Circular dichroism spectrum scan at 95°C to denature the protein.  
 WT: Wildtype ERG, P199L: P199L-ERG

Figure S3

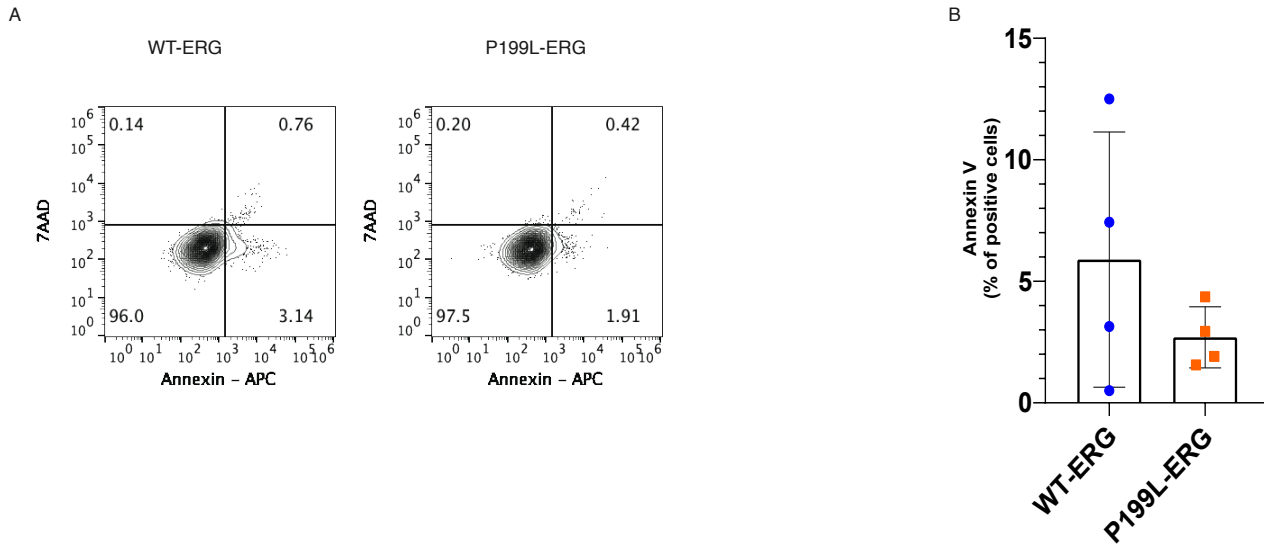

**Figure S3. P199L mitigates the effect of ERG force expression on self-renewal and myeloid differentiation of HSPCs.**

Apoptosis analysis of murine fetal liver derived HSPCs transduced with ERG variants using Annexin V staining. Results for round three of re-plating are shown. Representative flow cytometry analysis (left panel) and a summary for three independent experiments are shown (right panel).

Figure S4

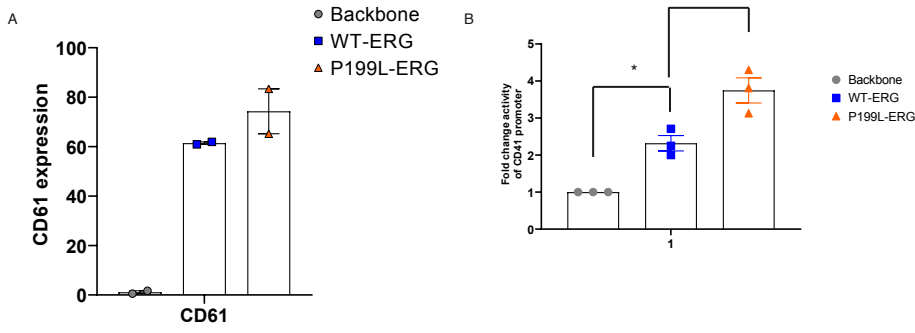

Figure S4. Induction of erythroid to megakaryocytic switch by ERG variants

A. Force expression of ERG variants in K562 cells. n=3 independent experiments in each experiment for each biological condition n=1 biological independent sample, CD61 expression was measured using flow cytometry, One-way Anova, Tukey's multiple comparison test.  
 B. Activity of the CD41 promoter upon expression of ERG variants in 293T cells. Fold change of luciferase expression was measured. n=3 independent experiments in each experiment for each biological condition n=1 biological independent sample, One-way Anova, Tukey's multiple comparison test, t-test, \* p< 0.05, \*\* p< 0.01, \*\*\* p<0.001. The p-value comparing Backbone vs WT-ERG is 0.0156 and the p-value comparing Backbone vs P199L-ERG is 0.0109.

Figure S5

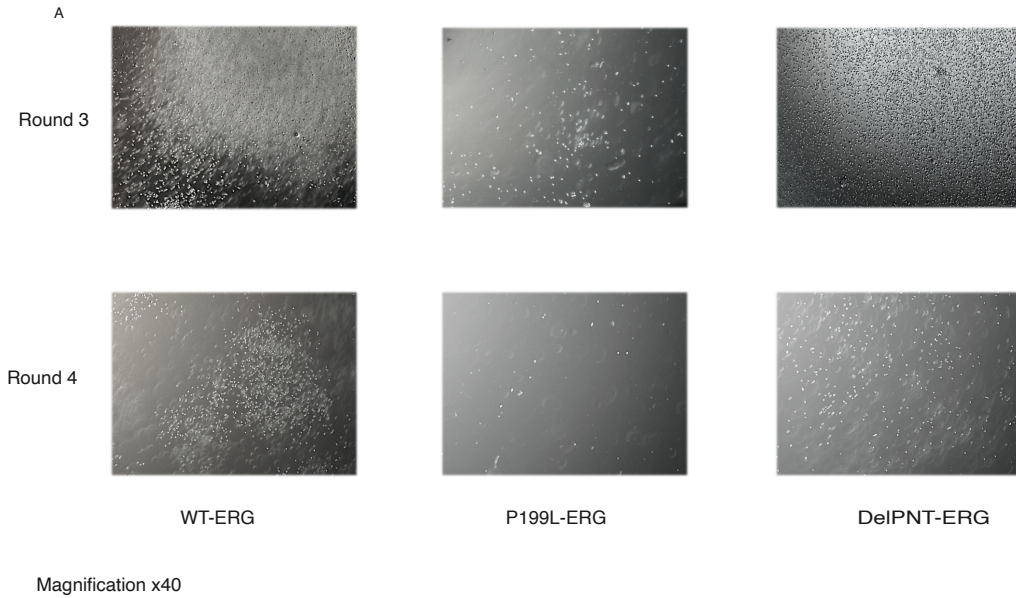

Magnification x40

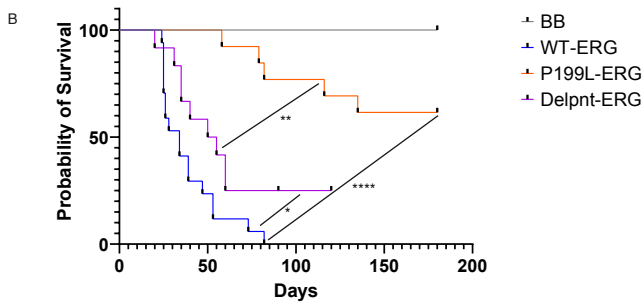

Figure S5. The phenotype of delPNT-ERG and P199L-ERG in transduction-transplantation assays in murine HSPCs.

A. Re-plating assays in semi solid conditions of fetal liver derived murine HSPCs transduced with ERG variants. CFU are presented. Media is supplemented with SCF, FLT3 and TPO.  
 B. Survival curve analysis of irradiated C57B/6 mice transplanted with murine fetal liver derived HSPCs following transduction with ERG variants ( $10^5$  transduced cells/mouse). A long-rank test was used to compare survival distribution between groups. The p-value is p<0.0001. \* p< 0.05, \*\*p< 0.01, \*\*\*p< 0.001. The p-values comparing WT-ERG vs P199L-ERG is <0.0001, WT-ERG vs DelPNT-ERG is 0.01556 and P199L-ERG vs DelPnt-ERG is 0.00655.

Figure S6

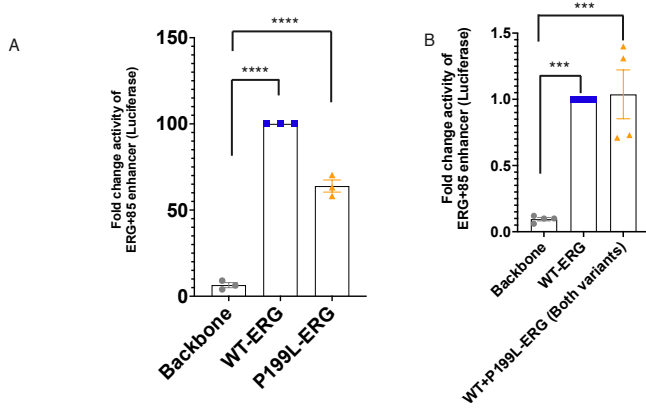

Figure S6. Activation of the ERG +85 stem cell enhancer in 293T following ERG variants force expression does not support a dominant negative role for P199L-ERG.

- A. ERG+85 enhancer luciferase activity following transfection with ERG variants. n=3 independent experiments in each experiment for each biological condition n=1 biological independent sample. One-way Anova, Tukey's multiple comparison test. The p-value comparing Backbone to WT-ERG or P199L-ERG is  $p < 0.0001$ .
- B. ERG+85 enhancer luciferase activity following co-transfection of WT-ERG and WT + P199L-ERG (Both variants) in 293T cells. For the co-transfection, 500ng of each construct was used. In the case of Backbone and WT ERG alone, 1000 ng was used (grey and blue colors, respectively). n= 4 independent experiments in each experiment for each biological condition n=1 biological independent sample. One-way Anova, Tukey's multiple comparison test. The p-value comparing Backbone to WT-ERG or P199L-ERG is  $p < 0.0005$ . denotes  $p < 0.05$ , \* denotes  $p < 0.01$ , \*\*\* denotes  $p < 0.001$ , \*\*\*\* denotes  $p < 0.0001$

Figure S7

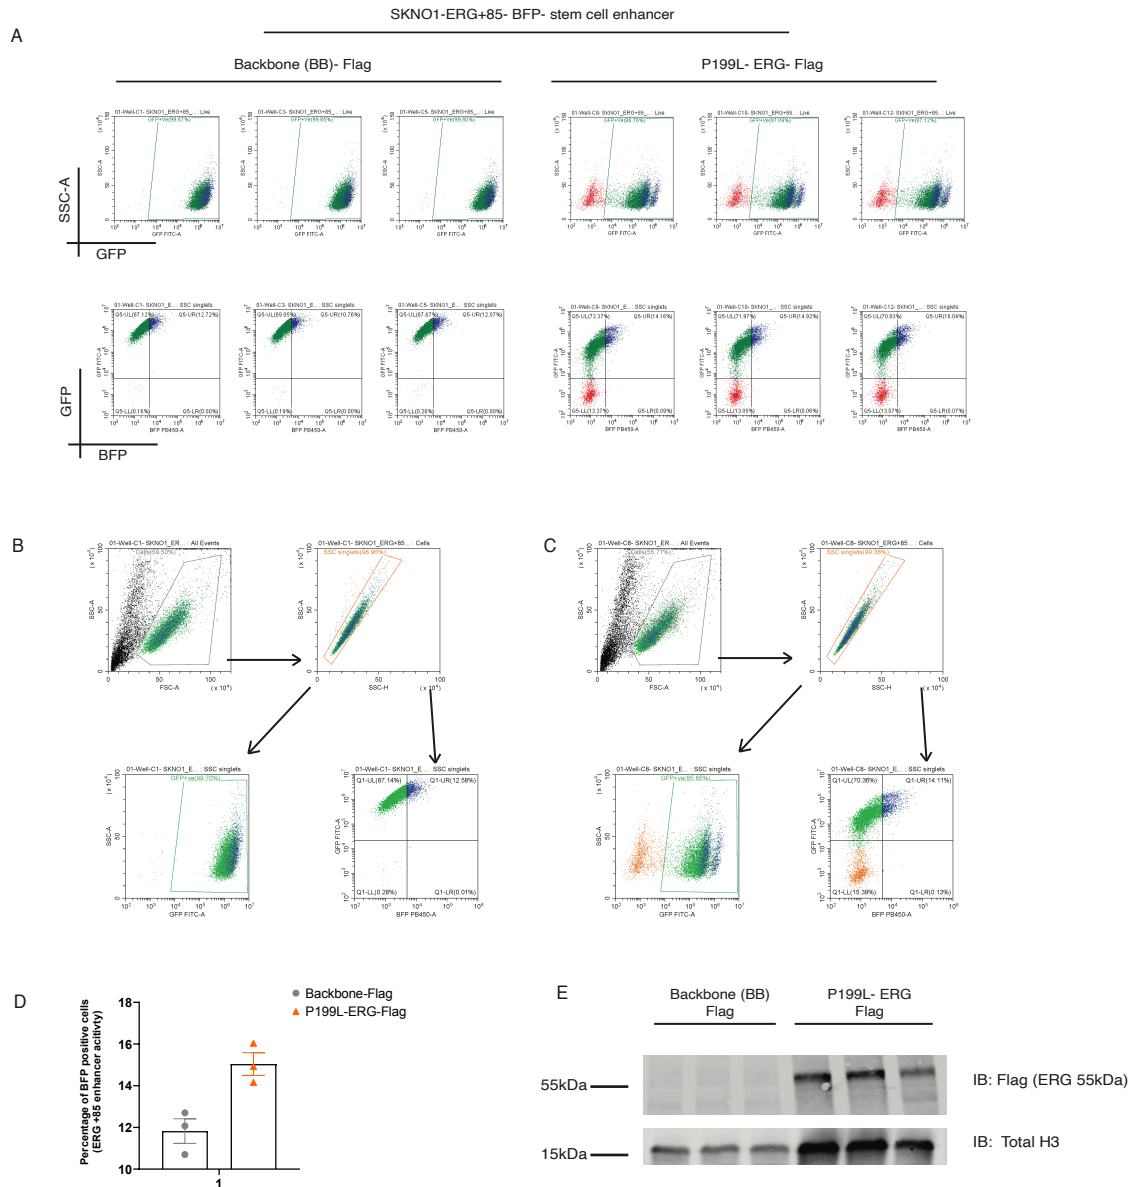

Figure S7. Activation of ERG+85 stem cell enhancer reporter in ERG dependent SKNO1 cells following forced expression of P199L-ERG.

- A. Upper line- GFP marks transduced cells stably expressing the reporter. Bottom line- BFP marks the activation of the ERG+85 enhancer.
- B. Gating strategy for SKNO1-ERG+85-BFP cells transduced with backbone-flag.
- C. Gating strategy for SKNO1-ERG+85-BFP cells transduced with P199L-flag.
- D. Summary of the three independent experiments.  $p = 0.016$ , t-test.
- E. Western blot in SKNO1 cells transduced with P199L-ERG and backbone for control. n=3 independent experiments in each experiment for each biological condition n=1 biological independent sample.

Figure S8

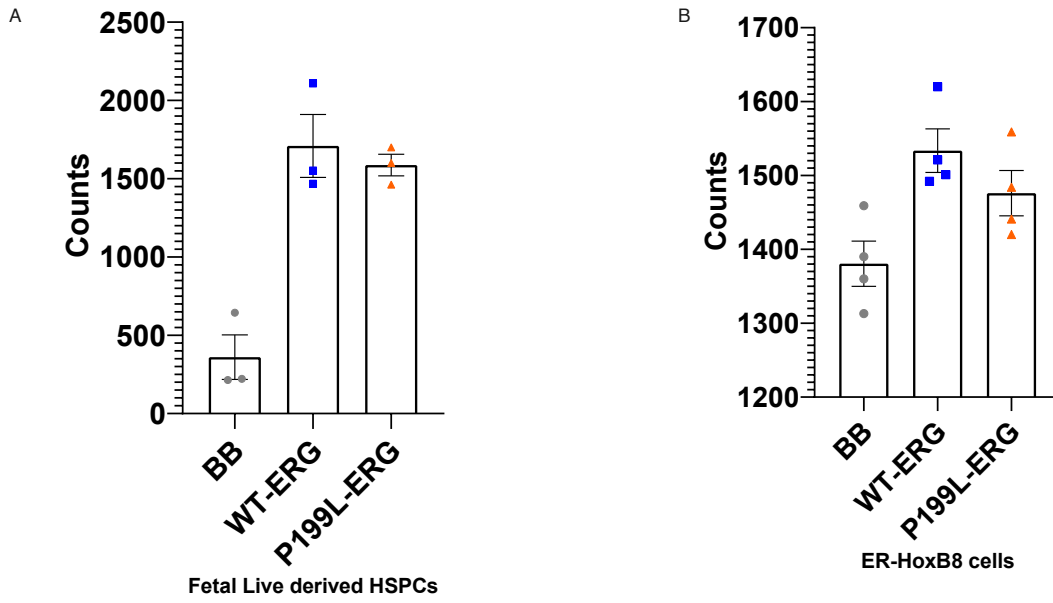

**Figure S8: Expression of endogenous Erg is similar in murine HSPC following WT and P199L-ERG force expression.**

- A. Expression counts obtained from RNA sequencing of fetal liver derived HSPC cells expressing ERG variants.
  - B. Expression counts obtained from RNA sequencing of ER-HoxB8 cells expressing ERG variants.
- Normalized counts are presented.

Figure S9

A

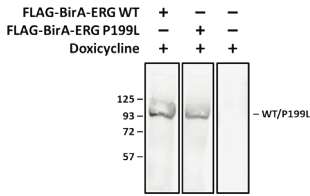

| FLAG – BirA*<br>ERG 1–479 | Technical<br>Replicate 1 | Technical<br>Replicate 2 |
|---------------------------|--------------------------|--------------------------|
| WT                        | 8433                     | 8740                     |
| P199L                     | 7088                     | 7298                     |

B

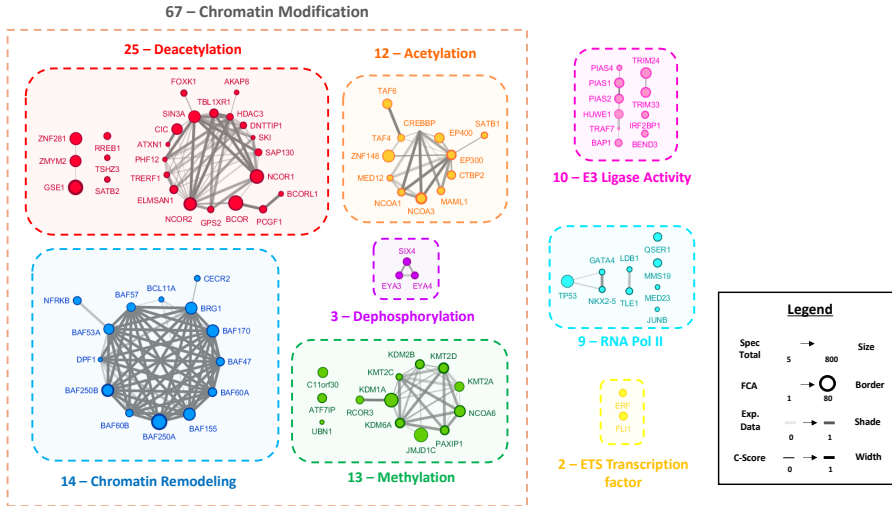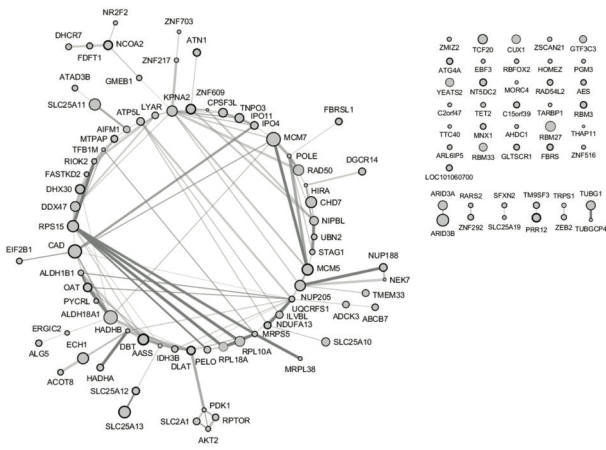

Figure S9. P199L disrupts the interaction of ERG with chromatin modifiers complexes.

A. Anti-BirA western blot of HEK293 Gnt<sup>-/-</sup> cell pellets for BiolD.

B. The complete network of identified proximal ERG interactors. Proteins are grouped and colored according to GO molecular function. The size of the nodes is weighted by total spectral count, the width of the node border is weighted by the FCA score, the shade of the connecting lines is weighted by the experimental/ biochemical evidence of the interaction data and the width of the connecting line is weighted by a combined score (C- Score) that factors in phylogenetic co-occurrence, co-expression and experimentally determined interaction between the two connected nodes.

Table S1 The proximitome of WT and P199L-ERG.

| WT Only | WT<br>AVG (SC/run) | WT<br>(Unique peptides)/run | WT<br>(% coverage) | P199L<br>AVG (SC/run) | % change<br>(P199L/WT) | P199L<br>SPe | P199L<br>bFDR | Function                  |
|---------|--------------------|-----------------------------|--------------------|-----------------------|------------------------|--------------|---------------|---------------------------|
| BCL11A  | 8.5                | 4                           | 11.95              | 2                     | -76.47                 | 0.27         | 0.27          | BAF superfamily           |
| CECR2   | 11                 | 2.5                         | 2.9                | 6.5                   | -40.91                 | 0.5          | 0.11          | BAF superfamily           |
| BEND3   | 15.5               | 7                           | 12                 | 4                     | -74.19                 | 0.55         | 0.07          | E3 Ligase                 |
| ERF     | 19.5               | 5                           | 21.55              | 2.5                   | -87.18                 | 0.5          | 0.13          | ETS                       |
| EP300   | 42.5               | 10                          | 8.55               | 15.5                  | -63.53                 | 0.5          | 0.09          | Histone acetyltransferase |
| TAF6    | 38                 | 9.5                         | 19                 | 14.5                  | -61.84                 | 0.28         | 0.27          | Histone acetyltransferase |
| MAML1   | 21.5               | 8                           | 18.3               | 9                     | -58.14                 | 0.2          | 0.29          | Histone acetyltransferase |
| HDAC3   | 14                 | 3.5                         | 15.2               | 3.5                   | -75.00                 | 0.15         | 0.32          | Histone deacetylase       |
| DNTTIP1 | 14                 | 4                           | 21.6               | 4.5                   | -67.86                 | 0.5          | 0.15          | Histone deacetylase       |
| GPS2    | 13                 | 2.5                         | 21.1               | 6.5                   | -50.00                 | 0.5          | 0.11          | Histone deacetylase       |
| TRERF1  | 10                 | 6                           | 10.2               | 2.5                   | -75.00                 | 0.5          | 0.13          | Histone deacetylase       |
| FOXK1   | 12.5               | 5                           | 10.6               | 6                     | -52.00                 | 0.5          | 0.1           | Histone deacetylase       |
| RREB1   | 16.5               | 4.5                         | 6.9                | 6                     | -63.64                 | 0.67         | 0.04          | Histone deacetylase       |
| SIN3A   | 88                 | 21                          | 25.9               | 60                    | -31.82                 | 0            | 0.58          | Histone deacetylase       |
| BCORL1  | 7.5                | 3                           | 2.4                | 4.5                   | -40.00                 | 0.48         | 0.2           | Histone deacetylase       |
| MED12   | 11.5               | 5.5                         | 4.05               | 4                     | -65.22                 | 0.2          | 0.29          | Histone methyltransferase |
| KMT2C   | 13.5               | 4                           | 3                  | 5                     | -62.96                 | 0.58         | 0.05          | Histone methyltransferase |
| JMJD1C  | 166                | 34.5                        | 23.4               | 89                    | -46.39                 | 0            | 0.55          | Histone methyltransferase |
| RCOR3   | 21                 | 7                           | 32.2               | 11                    | -47.62                 | 0.4          | 0.23          | Histone methyltransferase |
| LDB1    | 8.5                | 3                           | 20.15              | 3                     | -64.71                 | 0.5          | 0.15          | RNA polymerase II complex |
| QSER1   | 26.5               | 12                          | 13.65              | 11                    | -58.49                 | 0.01         | 0.43          | RNA polymerase II complex |
| ATG4A   | 20                 | 2                           | 11.6               | 2.5                   | -87.50                 | 0.49         | 0.18          | Other                     |
| RAD54L2 | 16                 | 6                           | 6.35               | 2.5                   | -84.38                 | 0.25         | 0.28          | Other                     |
| ZNF292  | 15                 | 7.5                         | 4.65               | 2                     | -86.67                 | 0.35         | 0.25          | Other                     |
| SLC2A1  | 15                 | 3.5                         | 8                  | 6.5                   | -56.67                 | 0.23         | 0.29          | Other                     |
| ARID3A  | 60                 | 11.5                        | 36.6               | 20                    | -66.67                 | 0            | 0.45          | Other                     |
| YEATS2  | 39                 | 14.5                        | 16.55              | 13.5                  | -65.38                 | 0            | 0.53          | Other                     |
| TET2    | 10                 | 4.5                         | 4.45               | 2.5                   | -75.00                 | 0.5          | 0.14          | Other                     |
| ZSCAN21 | 8                  | 2                           | 8.45               | 3                     | -62.50                 | 0.29         | 0.26          | Other                     |
| UBN2    | 10                 | 4.5                         | 4.75               | 5                     | -50.00                 | 0.5          | 0.11          | Other                     |
| ZEB2    | 12                 | 4                           | 4                  | 6.5                   | -45.83                 | 0.13         | 0.32          | Other                     |
| FDFT1   | 11.5               | 3                           | 10.3               | 6                     | -47.83                 | 0.4          | 0.23          | Other                     |

| WT and P199L | WT<br>AVG (SC/run) | WT<br>(Unique peptides)/run | WT<br>(% coverage) | P199L<br>AVG (SC/run) | % change<br>(P199L/WT) | P199L<br>SPe | P199L<br>bFDR | Function                  |
|--------------|--------------------|-----------------------------|--------------------|-----------------------|------------------------|--------------|---------------|---------------------------|
| BAF250B      | 120.5              | 30.5                        | 25.95              | 68                    | -43.57                 | 1            | 0             | BAF superfamily           |
| BAF155       | 108.5              | 16.5                        | 23.3               | 71.5                  | -34.10                 | 1            | 0             | BAF superfamily           |
| BAF250A      | 392                | 48.5                        | 38.65              | 238.5                 | -39.16                 | 1            | 0             | BAF superfamily           |
| BAF60B       | 19.5               | 7                           | 25.8               | 9.5                   | -51.28                 | 1            | 0             | BAF superfamily           |
| TRIM33       | 45.5               | 12                          | 14.1               | 28.5                  | -37.36                 | 1            | 0             | E3 Ligase                 |
| NCOA3        | 76                 | 21                          | 23.9               | 23.5                  | -69.08                 | 1            | 0             | Histone acetyltransferase |
| ZNF148       | 97.5               | 15                          | 35.15              | 53.5                  | -45.13                 | 0.81         | 0.02          | Histone acetyltransferase |
| NCOR1        | 189                | 36.5                        | 28.95              | 114                   | -39.68                 | 1            | 0             | Histone deacetylase       |
| ZMYM2        | 76.5               | 20                          | 25.7               | 52.5                  | -31.37                 | 1            | 0             | Histone deacetylase       |
| CIC          | 61.5               | 13                          | 18.25              | 37.5                  | -39.02                 | 1            | 0             | Histone deacetylase       |
| BCOR         | 238                | 38.5                        | 37.35              | 144.5                 | -39.29                 | 1            | 0             | Histone deacetylase       |
| ZNF281       | 103.5              | 20                          | 46.65              | 77.5                  | -25.12                 | 1            | 0             | Histone deacetylase       |
| GSE1         | 259                | 22.5                        | 40.95              | 173                   | -33.20                 | 1            | 0             | Histone deacetylase       |
| KMT2D        | 134.5              | 29.5                        | 21.65              | 61.5                  | -54.28                 | 1            | 0             | Histone methyltransferase |
| ATF7IP       | 33.5               | 9                           | 12.35              | 21.5                  | -35.82                 | 1            | 0             | Histone methyltransferase |
| KDM1A        | 184.5              | 20.5                        | 40.65              | 127.5                 | -30.89                 | 1            | 0             | Histone methyltransferase |
| KMT2D        | 56.5               | 24.5                        | 10.05              | 27.5                  | -51.33                 | 1            | 0             | Histone methyltransferase |
| TCF20        | 67.5               | 20.5                        | 22.9               | 55                    | -18.52                 | 1            | 0             | Other                     |
| PRR12        | 54                 | 14                          | 15                 | 22                    | -59.26                 | 1            | 0             | Other                     |
| THAP11       | 3.5                | 2                           | 5.4                | 6.5                   | +85.71                 | 1            | 0             | Other                     |
| CHD7         | 70.5               | 21                          | 11.95              | 35                    | -50.35                 | 1            | 0             | Other                     |



Table S1 (continued) The proximitome of WT and P199L-ERG.

| P199L Only | P199L<br>AVG (SC/run) | P199L<br>(Unique peptides)/run | P199L<br>(% coverage) | WT<br>AVG (SC/run) | % change<br>(P199L/WT) | WT<br>SPe | WT<br>bFDR | Function |
|------------|-----------------------|--------------------------------|-----------------------|--------------------|------------------------|-----------|------------|----------|
| ESRRA      | 11.5                  | 3                              | 8.4                   | 0                  | –                      | –         | –          | Other    |
| BCKDK      | 5                     | 2.5                            | 11.5                  | 1                  | +400.00                | 0.46      | 0.21       | Other    |
| ATP1B3     | 11                    | 3.5                            | 18.45                 | 4.5                | +144.44                | 0.5       | 0.14       | Other    |
| MRPL39     | 10                    | 2.5                            | 10.65                 | 4.5                | +122.22                | 0.5       | 0.1        | Other    |
| ADNP2      | 4.5                   | 2.5                            | 2.3                   | 1.5                | +200.00                | 0.49      | 0.18       | Other    |
| MDN1       | 12                    | 6                              | 1.55                  | 6                  | +100.00                | 0.67      | 0.04       | Other    |
| UTP6       | 5                     | 3                              | 8.55                  | 2                  | +150.00                | 0.5       | 0.15       | Other    |
| PNO1       | 9.5                   | 2.5                            | 14.3                  | 5                  | +90.00                 | 0.5       | 0.17       | Other    |
| YARS2      | 11                    | 5.5                            | 20.9                  | 6                  | +83.33                 | 0.13      | 0.32       | Other    |
| MECOM      | 11.5                  | 4                              | 6.4                   | 6.5                | +76.92                 | 0.5       | 0.09       | Other    |
| KIAA1279   | 14.5                  | 4.5                            | 15.3                  | 8.5                | +70.59                 | 0.29      | 0.26       | Other    |
| LRRC40     | 57.5                  | 15.5                           | 41.2                  | 42.5               | +35.29                 | 0.12      | 0.33       | Other    |
| DNAJA3     | 47                    | 7.5                            | 19.75                 | 36                 | +30.56                 | 0.15      | 0.32       | Other    |
| MRPL3      | 4                     | 2                              | 6.5                   | 2.5                | +60.00                 | 0.5       | 0.13       | Other    |
| TMED10     | 15                    | 4                              | 18.3                  | 11.5               | +30.43                 | 0.39      | 0.24       | Other    |
| IARS2      | 18                    | 7                              | 7.6                   | 14                 | +28.57                 | 0.72      | 0.03       | Other    |
| PHF14      | 5                     | 2                              | 4.8                   | 3.5                | +42.86                 | 0.5       | 0.11       | Other    |
| STT3B      | 11                    | 5                              | 7.4                   | 8.5                | +29.41                 | 0.78      | 0.02       | Other    |
| RPL7L1     | 14                    | 4.5                            | 21.95                 | 11.5               | +21.74                 | 0.64      | 0.04       | Other    |
| DLD        | 48.5                  | 5                              | 19.75                 | 41.5               | +16.87                 | 0.77      | 0.02       | Other    |

Figure S10

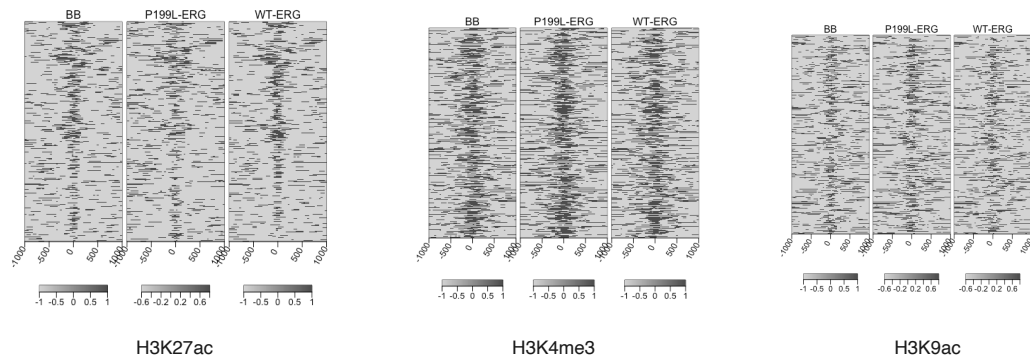

**Figure S10. H3K27ac signature does not significantly differ between constructs at regions associated with transcription start sites.**

ChIP sequencing analysis of ER-HoxB8 cells. Heatmap hierarchical clustering centered on H3K27ac peaks associated with differentially expressed and repressed genes following WT-ERG force expression in ER-HoxB8 cells. Co-occupancy regions of H3K27ac, H3K4me3 and H3K9ac marks is shown. BB- Backbone.

A

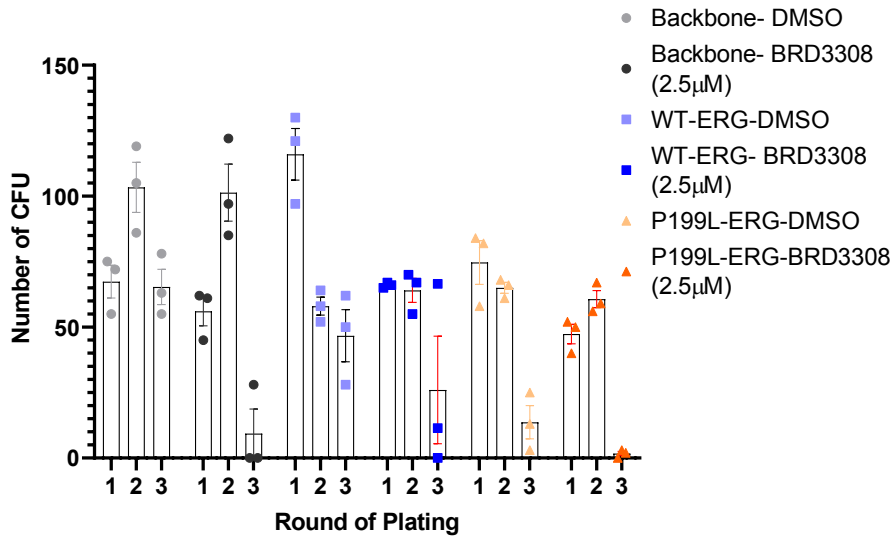

B

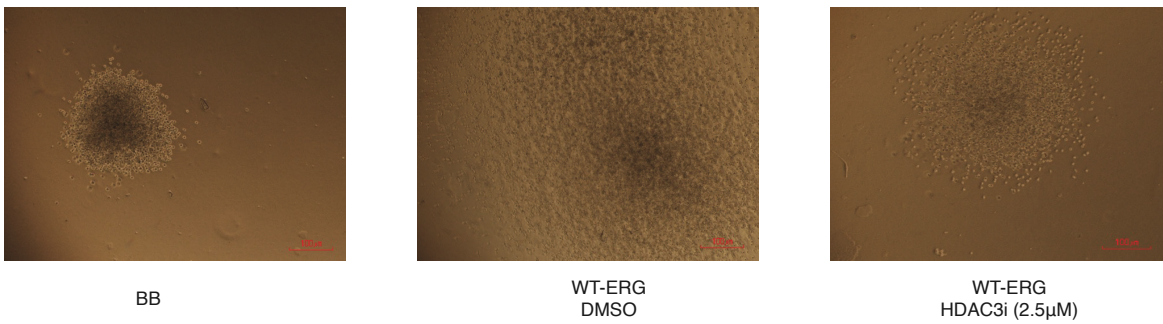

**Figure S11. HDAC3 inhibition disrupts the self-renewal capacity of HSPCs over-expressing ERG.**

Re-plating assay in semi-solid condition of murine fetal liver derived HSPCs (E13.5) transduced with ERG variants (media was supplemented with IL3, IL6, SCF, 10<sup>4</sup> cells in each round). Cells were treated on the day of plating with either 2.5µM BRD3308 or DMSO for control. A summary of four independent experiments is shown.

- A. Number of CFU per 10<sup>4</sup> cells plated is presented for each round of plating (Data are represented as means ± SEM, ).  
 B. Microscopic view of colonies morphology between groups. Magnification 40x.

Tabke S2.

| Differentiation |           | ENSMUSG00000015053.11 | ENSMUSG00000040732.15 | ENSMUSG00000030786.15 | ENSMUSG00000057666.15 |
|-----------------|-----------|-----------------------|-----------------------|-----------------------|-----------------------|
| Hours           | Replicate | GATA2                 | ERG                   | ITGAM (CD11b)         | GAPDH                 |
| 0               | A         | 3023                  | 3632                  | 176                   | 65672                 |
| 0               | B         | 3368                  | 4106                  | 236                   | 75793                 |
| 4               | A         | 5199                  | 4012                  | 159                   | 111028                |
| 4               | B         | 4283                  | 3681                  | 172                   | 93035                 |
| 8               | A         | 7487                  | 3615                  | 286                   | 86209                 |
| 8               | B         | 6703                  | 3465                  | 250                   | 77798                 |
| 12              | A         | 5916                  | 3487                  | 700                   | 72325                 |
| 12              | B         | 5358                  | 3299                  | 596                   | 80049                 |
| 24              | A         | 3857                  | 3018                  | 1353                  | 74852                 |
| 24              | B         | 4264                  | 3219                  | 1534                  | 92318                 |
| 36              | A         | 2798                  | 3195                  | 5671                  | 75378                 |
| 36              | B         | 3235                  | 2935                  | 5143                  | 93095                 |
| 48              | A         | 2362                  | 3191                  | 19213                 | 74978                 |
| 48              | B         | 2498                  | 3361                  | 15612                 | 70729                 |
| 72              | A         | 1296                  | 2572                  | 62135                 | 46954                 |
| 72              | B         | 1382                  | 2469                  | 48072                 | 52041                 |
| 96              | A         | 514                   | 1999                  | 106734                | 40107                 |
| 96              | B         | 569                   | 2445                  | 104976                | 41652                 |
| 120             | A         | 310                   | 651                   | 97810                 | 45616                 |
| 120             | B         | 325                   | 459                   | 63033                 | 36412                 |

**Table S2:** Normalized read counts for mouse Gata2, Erg, Gapdh and Cd11b using the 5-day differentiation time course of ER-HoxB8 cells. RNA-seq A and B stand for two different replicates. Courtesy of Dr. David Sykes.

Figure S12

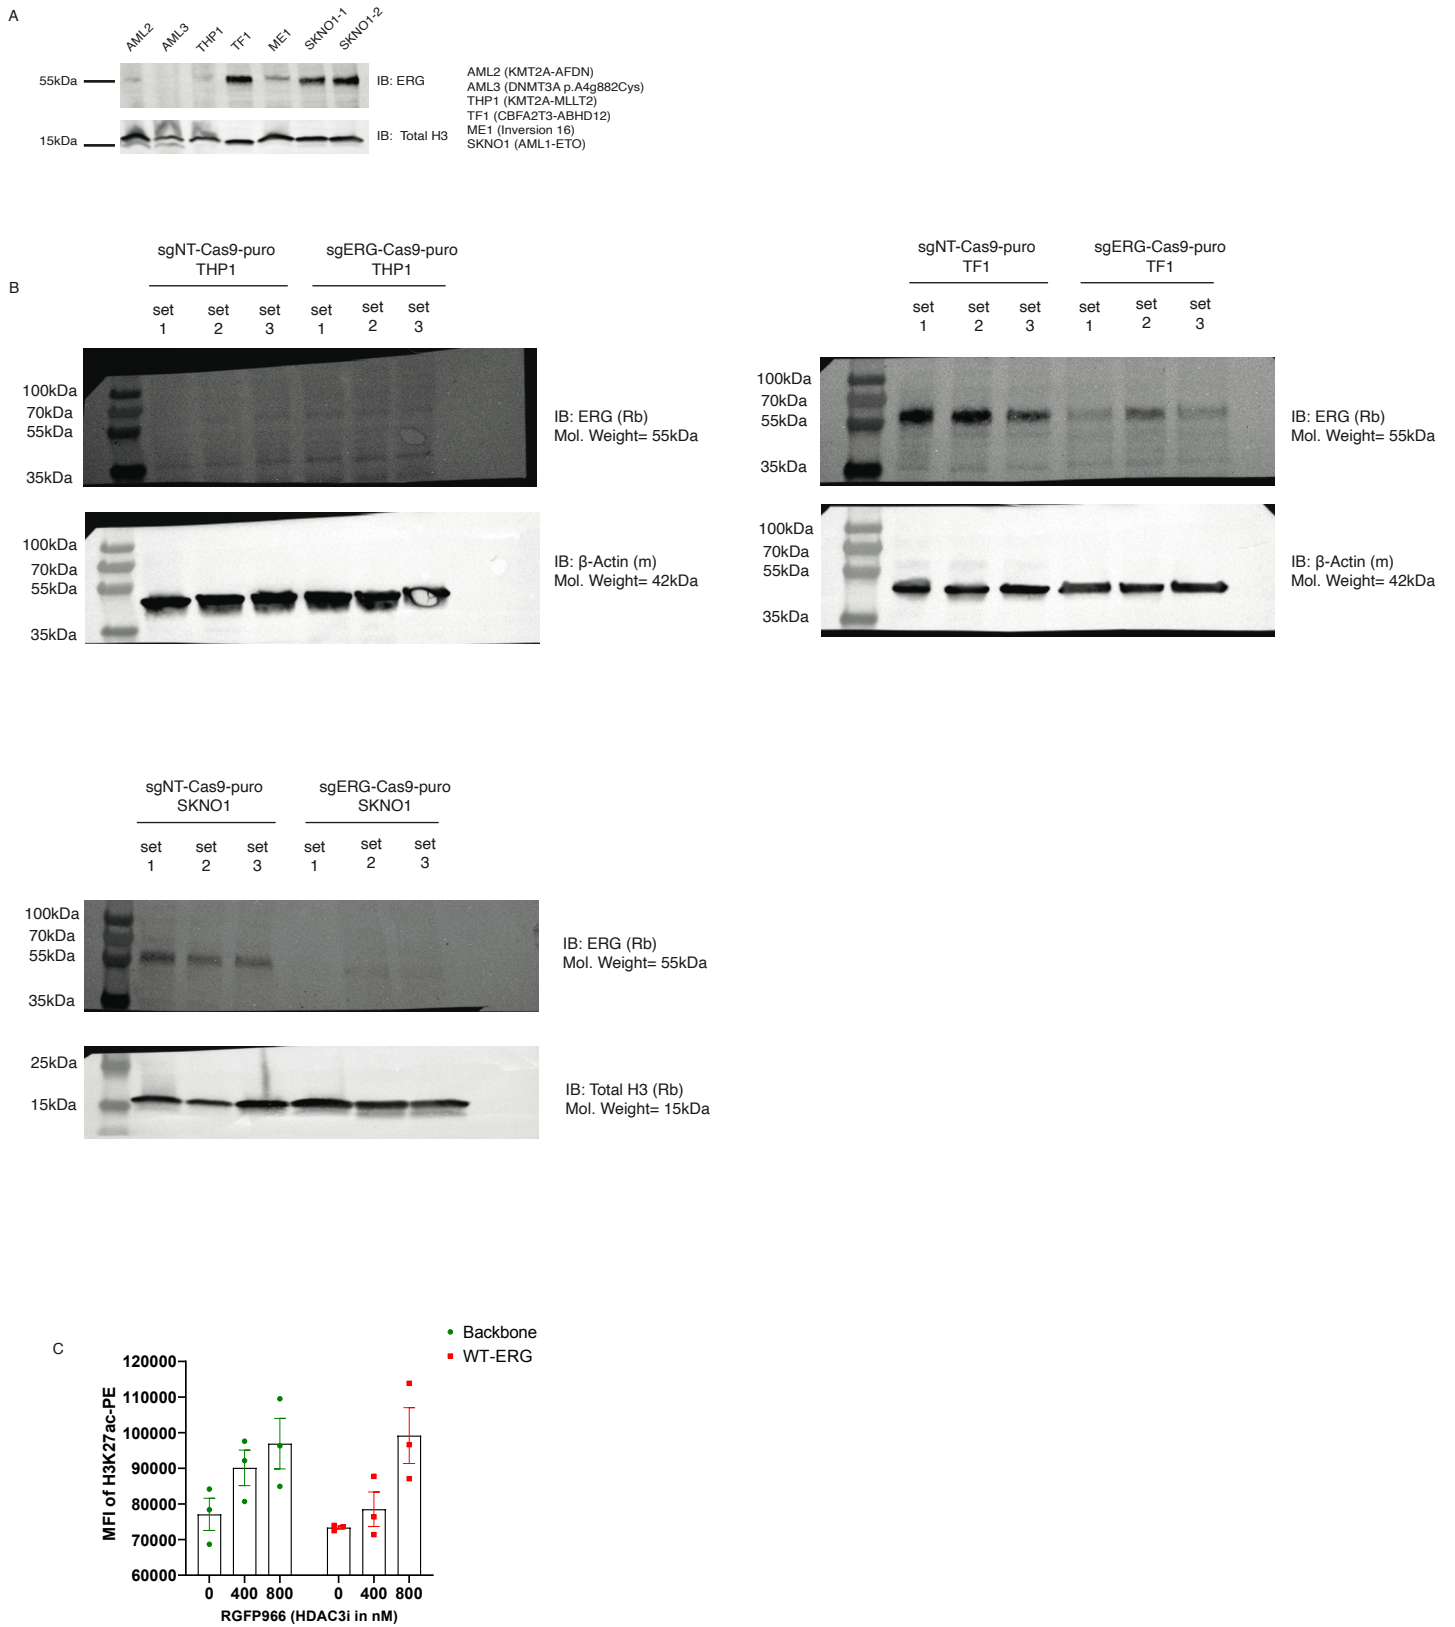

Figure S12. HDAC3 inhibition attenuated ERG-dependent human AML proliferation.

- A. Immunoblot for human ERG in human AML lines.  
 B. Verification of ERG knockout in THP1, TF1 and SKNO1 cells using CRISPR-Cas9 system (upper panel- immunoblot for ERG, lower panel- immunoblot for human  $\beta$ -Actin).  
 C. Western blot in SKNO1 cells transduced with P199L-ERG and backbone for control.

Figure S13

A

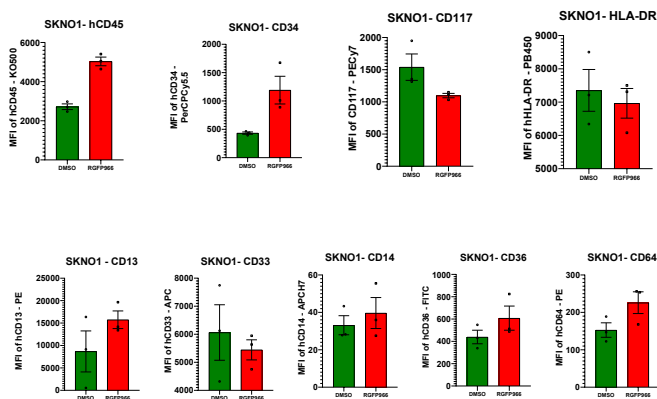

B

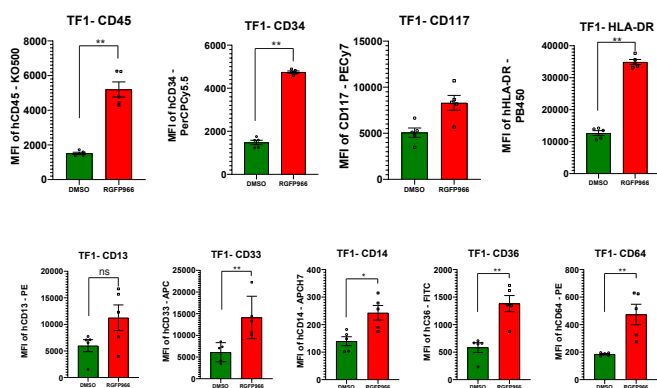

C

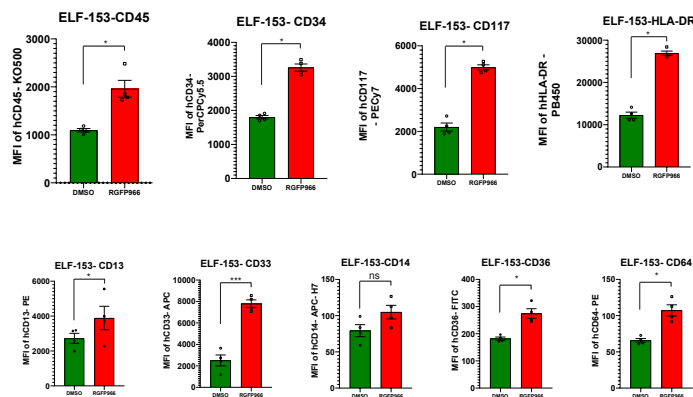

D

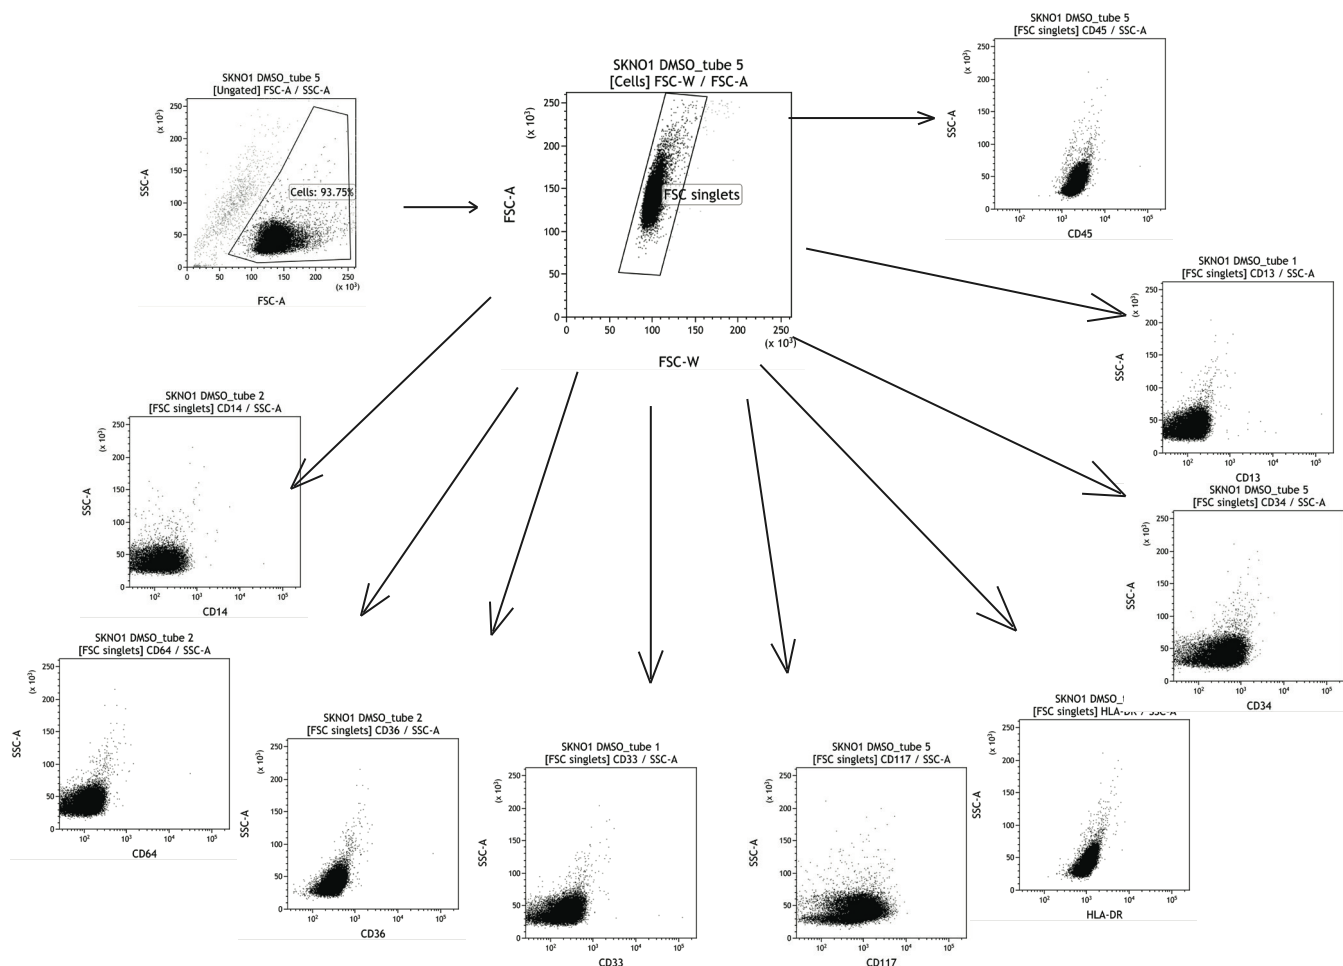

Figure S13

E

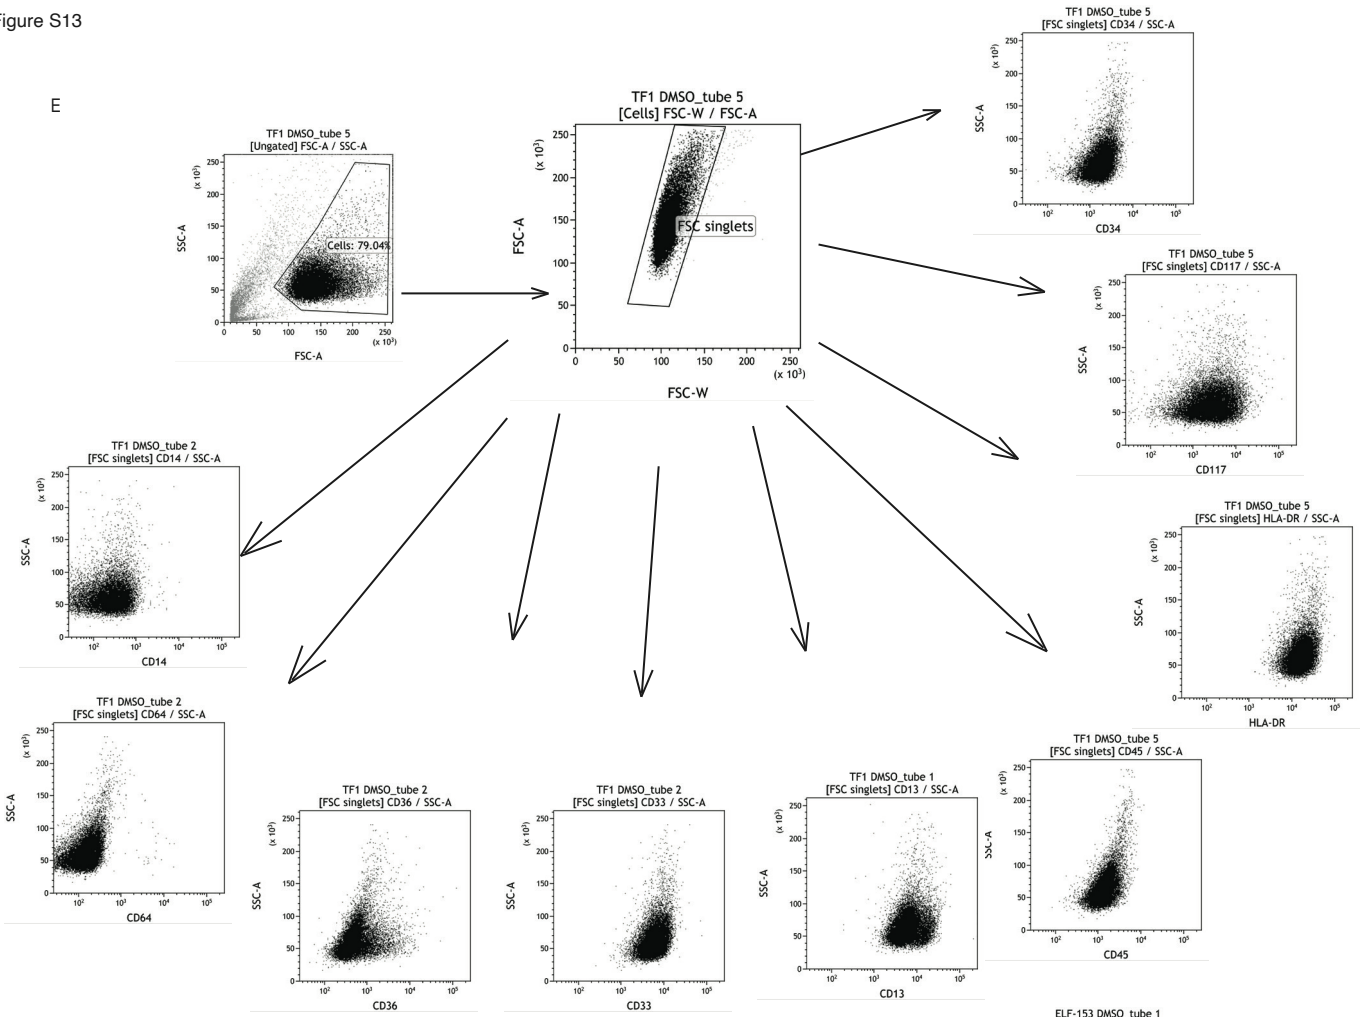

F

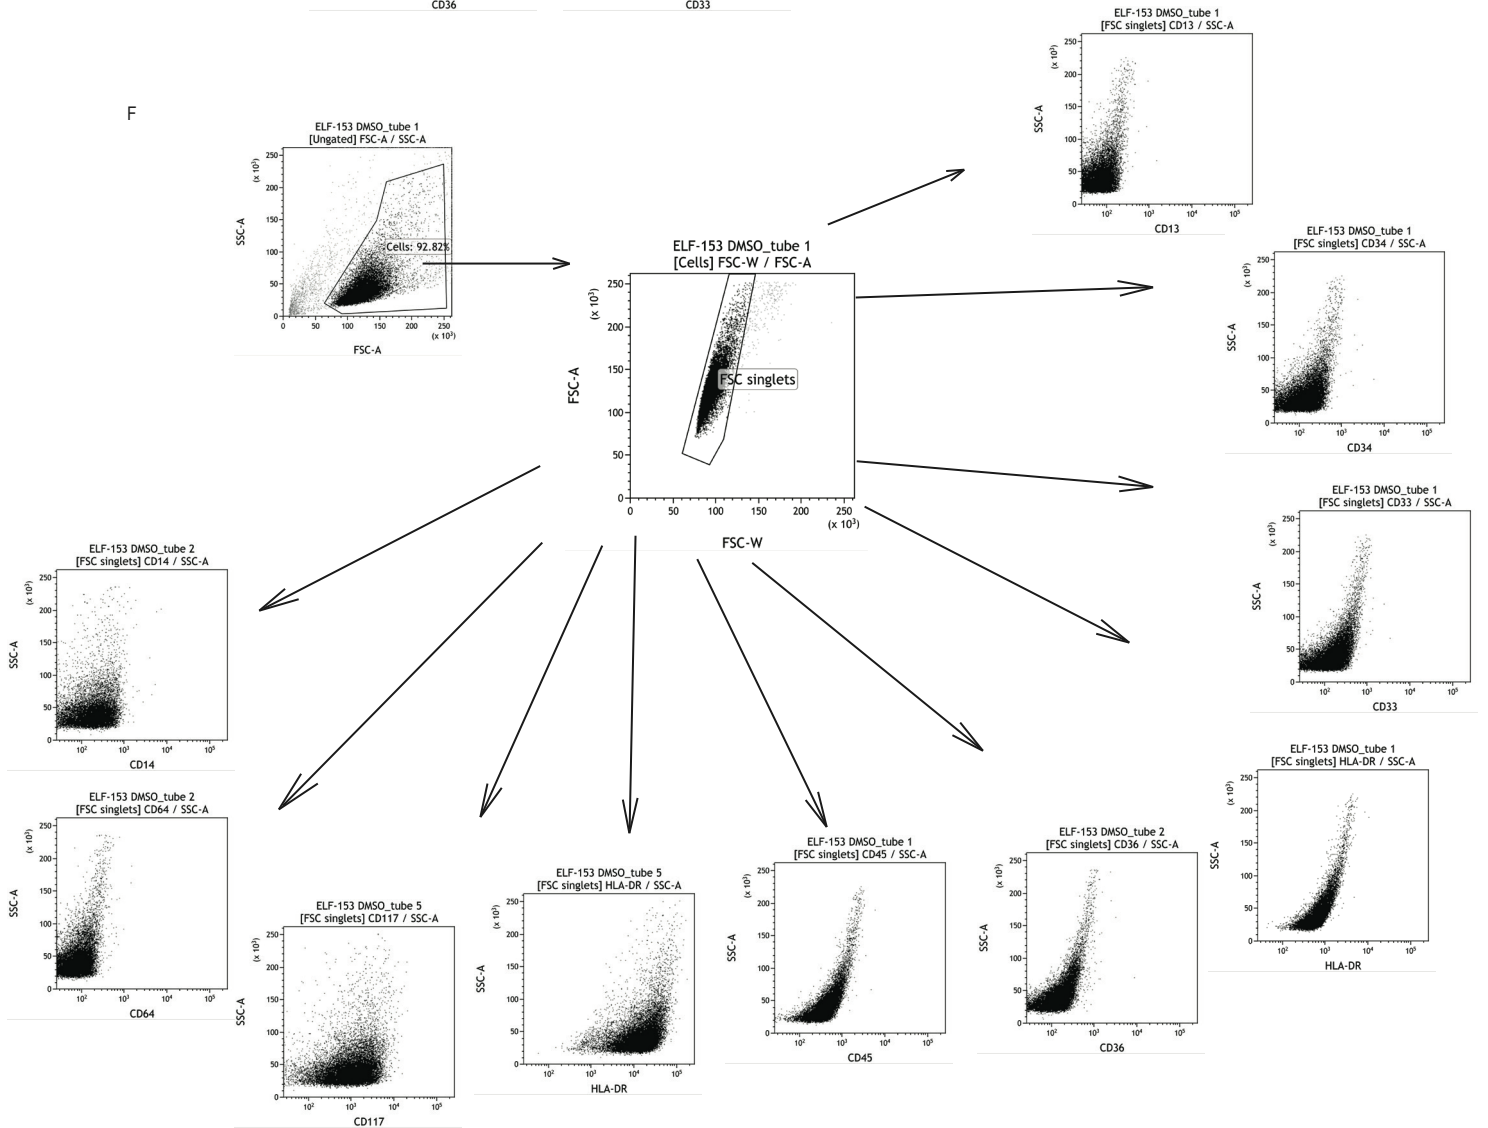

**Figure S13. Flow cytometry analysis of ERG dependent human AML cell lines following pharmacological HDAC3 inhibition.**

- A. Immunophenotype was assessed for SKNO1 cells following treatment with RGFP966 for 96 hours. n= 3 independent biological replicates.
- B. Immunophenotype was assessed for TF1 cells following treatment with RGFP966 for 96 hours. n= 3 independent biological replicates.
- C. Immunophenotype was assessed for ELF-153 cells following treatment with RGFP966 for 96 hours. n= 3 independent biological replicates
- D. Gating strategy used to analyse the mean fluorescent intensity of each fluorephore in SKNO1 cells treated with either DMSO or RGFP966.
- E. Gating strategy used to analyse the mean fluorescent intensity of each fluorephore in TF1 cells treated with either DMSO or RGFP966.
- F. Gating strategy used to analyse the mean fluorescent intensity of each fluorephore in ELF-153 cells treated with either DMSO or RGFP966.





Figure S15

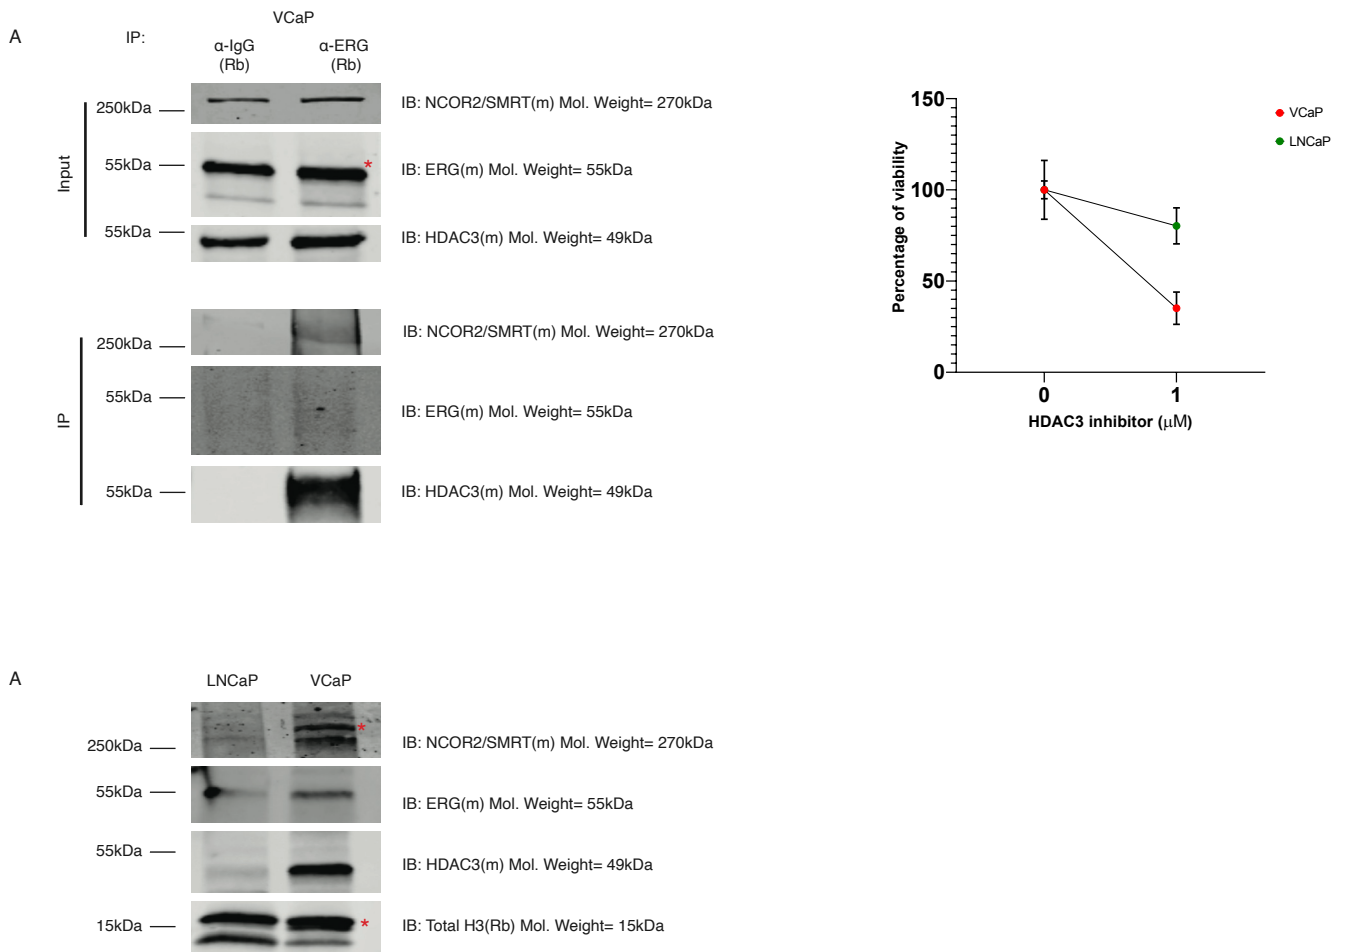

**Figure S15: ERG driven prostate cancer cells are sensitive to HDAC3 inhibition.**

- A. Co-IP for endogenous ERG and the NCoR-HDAC3 complex.  
 B. HDAC3 inhibition using RGFP966 (HDAC3 inhibitor) in VCaP and LNCaP cells. Live cells were counted using flow cytometry. n= 3 independent biological experiments  
 C. Immunoblot for ERG and NCoR-HDAC3 proteins in VCaP and LNCaP cells. Red asterisk marks correct position of the band according to kDa estimation.

A

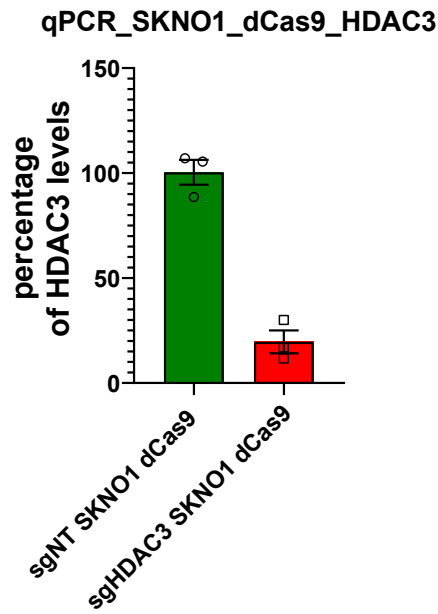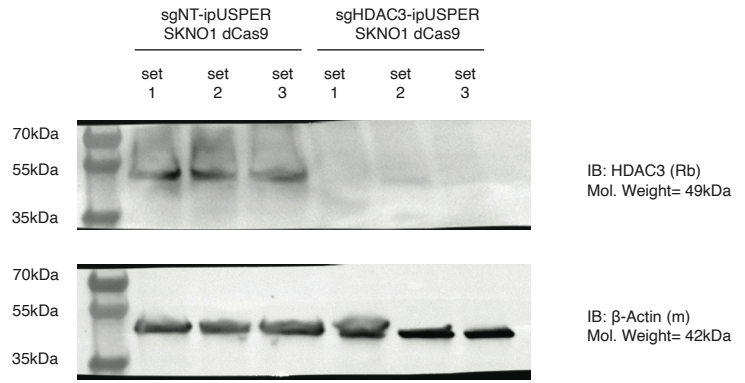

B

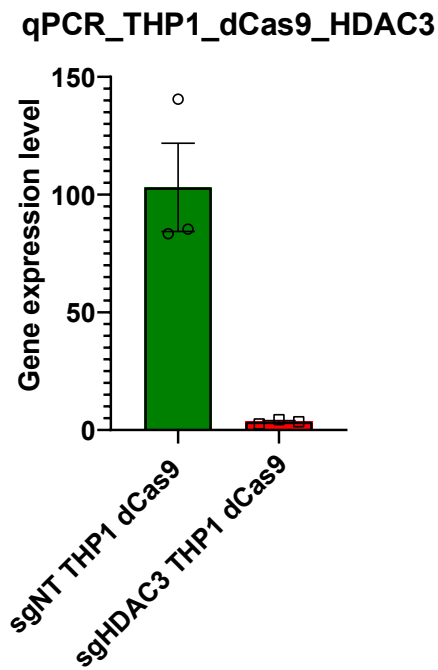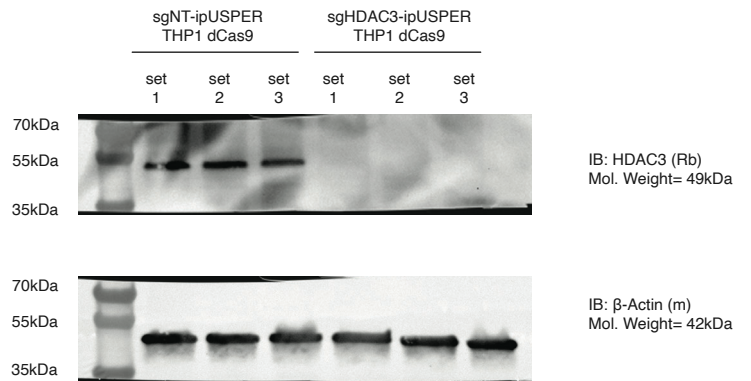

Figure S16: CRISPR-dCas9 targeting of HDAC3 expression in SKNO1 and THP1 cells.

- A. qPCR (left panel) and immunoblot for human HDAC3 (right panel) in SKNO1 cells. Approximately 75-80% decrease in HDAC3 signal was measured in three sets.
  - B. qPCR (left panel) and immunoblot for human HDAC3 (right panel) in THP1 cells.
- n=3 independent biological experiments
